# Supplementary material
Source: ML conference proceedings conference paper supplement (https://openreview.net/forum?id=aqr5pyOQpf)
Supplement: supplementary_material [file DermaConIN_Datasheet.pdf › Supplementary/DermaConIN_Datasheet.pdf]

# Datasheet for DermaCon-IN

This document outlines the schema for interpreting the CSV metadata file, detailing all fields, their descriptions, data types, and valid entries. It also includes comprehensive statistics such as fine-grained counts of specific fields. Furthermore, the document presents a hierarchical label mapping, organizing disease annotations from broader main classes to finer-grained subclasses and specific disease labels.

Table 1: Schema of the DermaCon-IN Dataset

| Column Name    | Type   | Description                                                         | Allowed Values / Notes                                                                                                |
|----------------|--------|---------------------------------------------------------------------|-----------------------------------------------------------------------------------------------------------------------|
| Image_name     | String | Unique filename or image identifier.                                | Image names with various conventions, e.g., IMG_0001.jpg                                                              |
| Subject_ID     | String | Unique subject/patient identifier.                                  | Example: SUB00001                                                                                                     |
| Quality        | String | Diagnostic image quality assessment.                                | “Yes, the quality is sufficient for diagnosis”, “No, the quality is insufficient for diagnosis”, “Image looks normal” |
| Sex            | String | Biological sex of the subject.                                      | “Male”, “Female”                                                                                                      |
| Age            | String | Age group of the subject in years.                                  | “0 - 10”, “10 - 20”, ..., “80 - 100”                                                                                  |
| Gradability    | String | Whether the image is gradable.                                      | “Yes” or “No”                                                                                                         |
| Fitzpatrick    | String | Fitzpatrick Skin Type.                                              | “FST 1” to “FST 6”; “N/A” for ungradable images                                                                       |
| Monk_skin_tone | String | Monk Skin Tone scale value.                                         | “MST 1” to “MST 10”; “N/A” for ungradable images                                                                      |
| Body_part      | String | Anatomical region captured in the image.                            | 49 body parts, e.g., “Back”, “Scalp”, “Genital Area (Pubic Region)”                                                   |
| Descriptors    | String | Descriptive visual/morphologic concepts associated with the lesion. | 47 descriptors like “Abscess”, “Plaque”, “Vesicle”; multiple values separated by semicolons                           |
| Main_class     | String | Broad etiological disease class (Rook’s taxonomy).                  | 8 classes: “Infectious Disorders”, “Inflammatory Disorders”, etc.                                                     |
| Sub_class      | String | Specific disease subtype within the main class.                     | 19 sub-classes like “Hair Disorders”, “Fungal Infections”, “Keratinisation Disorders”                                 |
| Disease_label  | String | Disease label from dermatological ontology.                         | 245 disease names covering common and rare conditions                                                                 |
| Confidence     | Int    | Diagnostic confidence rating by annotator.                          | Integer from 1 (low) to 5 (high)                                                                                      |

Table 2: Distribution of Demographic Metadata

Sex Distribution

| Value  | Count |
|--------|-------|
| Male   | 3394  |
| Female | 2056  |

Confidence Score

| Score | Count |
|-------|-------|
| 2     | 1     |
| 3     | 41    |
| 4     | 199   |
| 5     | 5209  |

Gradability

| Value | Count |
|-------|-------|
| Yes   | 5450  |
| No    | 0     |

Age Group Distribution

| Age Range | Count |
|-----------|-------|
| 0–10      | 532   |
| 10–20     | 628   |
| 20–40     | 2153  |
| 40–60     | 1681  |
| 60–80     | 430   |
| 80–100    | 26    |

Fitzpatrick Type

| FST   | Count |
|-------|-------|
| FST 3 | 1403  |
| FST 4 | 2620  |
| FST 5 | 1285  |
| FST 6 | 136   |
| N/A   | 6     |

Monk Skin Tone

| MST   | Count |
|-------|-------|
| MST 4 | 152   |
| MST 5 | 1272  |
| MST 6 | 1961  |
| MST 7 | 1684  |
| MST 8 | 368   |
| MST 9 | 7     |
| N/A   | 6     |

Table 3: Distribution of Clinical Concept Annotations (Descriptor and Body Part)

| Descriptor Counts         |       | Body Part Counts                                    |       |
|---------------------------|-------|-----------------------------------------------------|-------|
| Concept                   | Count | Concept                                             | Count |
| Plaque                    | 2316  | Head Cheeks                                         | 799   |
| Pigmented                 | 1931  | Trunk Abdomen                                       | 568   |
| Erythema                  | 1594  | Lower Extremities Lower Legs                        | 449   |
| Scale                     | 1466  | Genital Area (Pubic Region)                         | 384   |
| Patch                     | 1336  | Lower Extremities Thighs (Femoral Region)           | 348   |
| Papule                    | 1055  | Groin (Inguinal Region)                             | 344   |
| White (Hypopigmentation)  | 831   | Lower Extremities Feet (Pedal Region)               | 338   |
| Erosion                   | 417   | Upper Extremities Hands (Manus)                     | 330   |
| Crust                     | 237   | Back                                                | 316   |
| Macule                    | 223   | Upper Extremities Forearms (Antebrachium)           | 271   |
| Vesicle                   | 219   | Trunk Buttocks (Gluteal Region)                     | 254   |
| Pustule                   | 189   | Head Scalp                                          | 253   |
| Nodule                    | 188   | Upper Extremities Hands (Manus) Fingers (Digits)    | 253   |
| Comedo                    | 174   | Neck                                                | 243   |
| Atrophy                   | 167   | Head Forehead                                       | 239   |
| Hair Patch                | 140   | Trunk Abdomen anterior                              | 229   |
| Scar                      | 132   | Head Nose                                           | 185   |
| Fissure                   | 131   | Lower Extremities Lower Legs (Crural Region)        | 172   |
| Exudate                   | 125   | Head Temples                                        | 169   |
| Lichenification           | 121   | Upper Extremities Upper Arms (Brachium)             | 168   |
| Hyperkeratotic plaques    | 118   | Lower Extremities Ankles (Tarsal Region)            | 159   |
| Bulla                     | 94    | Trunk Chest (Thorax)                                | 152   |
| Excoriation               | 87    | Head Chin                                           | 132   |
| Xerosis                   | 84    | Head Lips                                           | 117   |
| Abscess                   | 73    | Lower Extremities Feet (Pedal Region) Toes (Digits) | 116   |
| Edema                     | 65    | Lower Extremities Knees (Patellar Region)           | 110   |
| Discolored Nail           | 53    | Trunk Abdomen posterior                             | 110   |
| Warty                     | 53    | Lower Extremities Soles (Plantar Region)            | 95    |
| Cyst                      | 48    | Palms                                               | 93    |
| Wheal                     | 43    | Upper Extremities Elbows                            | 91    |
| Pedunculated              | 42    | Armpits (Axillary Region)                           | 85    |
| Burrow                    | 41    | Head Ears                                           | 85    |
| Ulcer                     | 38    | Upper Extremities Shoulders                         | 72    |
| Striae                    | 28    | Head Eye                                            | 61    |
| Induration                | 24    | LowerBack (Lumbus)                                  | 61    |
| Purpura/Petechiae         | 21    | Upper Extremities Wrists (Carpus)                   | 40    |
| Acuminate                 | 18    | Navel (Umbilicus)                                   | 38    |
| Exophytic/Fungating       | 18    | Trunk Back (Dorsum)                                 | 34    |
| Telangiectasia            | 13    | Back of the Knees (Popliteal Region)                | 31    |
| Brown (Hyperpigmentation) | 8     | Calves (Sural Region)                               | 26    |
| Salmon                    | 4     | Trunk AbdomenNavel (Umbilicus)                      | 22    |
| Dilated Vein              | 3     | Lower Extremities Toes (Digits)                     | 19    |
| Flat-topped               | 2     | Breasts (Mammary Region)                            | 17    |
| Pitted Nail               | 2     | Nails Fingernails                                   | 14    |
| Yellow                    | 2     | Mucous Membranes Oral Cavity                        | 10    |
| Gray                      | 1     | Tongue                                              | 10    |
| Poikiloderma              | 1     | Lower Extremities Hips (Coxal Region)               | 8     |
|                           |       | Perianal Area                                       | 7     |
|                           |       | Nails Toenails                                      | 4     |

Table 4: Distribution of Disease Categories: Main Class and Sub Class

| Main_class Distribution   |       | Sub_class Distribution                                                        |       |
|---------------------------|-------|-------------------------------------------------------------------------------|-------|
| Main_class                | Count | Sub_class                                                                     | Count |
| Infectious Disorders      | 2227  | Infectious skin conditions -Fungal                                            | 1513  |
| Inflammatory Disorders    | 1592  | Pigmentary Disorders                                                          | 831   |
| Pigmentary Disorders      | 831   | Inflammatory skin diseases (Eczema and Dermatitis)                            | 727   |
| Skin Appendages Disorders | 480   | Inflammatory skin diseases (Other)                                            | 447   |
| Other skin disorders      | 159   | Inflammatory skin diseases (Psoriasis and Lichenoid disorders)                | 418   |
| Keratanisation Disorders  | 72    | Sebaceous Glands and Acneiform Disorders                                      | 352   |
| Neoplasms and tumors      | 52    | Infectious skin conditions -Parasitic                                         | 241   |
| No Definite Diagnosis     | 37    | Infectious skin conditions -Bacterial                                         | 176   |
|                           |       | Other skin disorders                                                          | 159   |
|                           |       | Hair Disorders                                                                | 128   |
|                           |       | Infectious skin conditions -Viral                                             | 106   |
|                           |       | Inflammatory skin diseases + Infectious skin conditions -Bacterial            | 104   |
|                           |       | Keratanisation Disorders                                                      | 72    |
|                           |       | Neoplasms and tumors                                                          | 52    |
|                           |       | No Definite Diagnosis                                                         | 37    |
|                           |       | Infectious skin conditions -Parasitic + Infectious skin conditions -Bacterial | 36    |
|                           |       | Infectious skin conditions -Fungal + Infectious skin conditions -Bacterial    | 26    |
|                           |       | Inflammatory skin diseases + Infectious skin conditions -Fungal               | 13    |
|                           |       | Infectious skin conditions -Leprosy                                           | 11    |

Table 5: Distribution of Disease Labels

| Disease Label                       | Count | Disease Label                        | Count | Disease Label                                     | Count | Disease Label                                         | Count |
|-------------------------------------|-------|--------------------------------------|-------|---------------------------------------------------|-------|-------------------------------------------------------|-------|
| Vitiligo                            | 601   | Chickenpox exanthem                  | 13    | Granuloma pyogenic                                | 4     | Balanitis                                             | 1     |
| Tinea Cruris                        | 545   | Scar Condition                       | 13    | Herpes genitalis                                  | 4     | Becker nevus                                          | 1     |
| Tinea Corporis                      | 323   | Discoid Lupus Erythematosus          | 12    | Kumkum Dermatitis                                 | 4     | Bowen's Metastasis                                    | 1     |
| Scabies                             | 183   | Ear Eczema                           | 12    | Lichenoid eruption                                | 4     | Bullous Fixed Drug Eruption                           | 1     |
| Acne                                | 181   | Epidermolysis Bullosa Simplex        | 12    | Lupus vulgaris                                    | 4     | Cellulitis                                            | 1     |
| Psoriasis                           | 159   | Hemangioma                           | 12    | Mycosis fungoides                                 | 4     | Chronic eczema with secondary infection               | 1     |
| Eczema                              | 156   | Hypertrophic Scar / Keloid           | 12    | Phimosi                                           | 4     | Chronic eczema with secondary infection               | 1     |
| Contact Dermatitis                  | 141   | Sebacous Cyst                        | 12    | Sun damaged skin                                  | 4     | Cutaneous Anthrax                                     | 1     |
| Tinea Faciei                        | 137   | Vasculitis                           | 12    | Sunburn                                           | 4     | Cutaneous larva migrans                               | 1     |
| Steroid Modified Tinea              | 114   | Verruca Vulgaris                     | 12    | Ulcer                                             | 4     | Cyst                                                  | 1     |
| Candidal Intertrigo                 | 112   | Hansen's disease                     | 11    | Urticarial vasculitis                             | 4     | Dermatofibroma                                        | 1     |
| Alopecia Areata                     | 83    | Milia                                | 11    | Acne Keloidalis                                   | 3     | Eczematized Tinea                                     | 1     |
| Melasma                             | 80    | Basal Cell Carcinoma                 | 10    | Bullous Pemphigoid                                | 3     | Erythrasma                                            | 1     |
| Tinea Versicolor                    | 78    | Epidermal nevus                      | 10    | Cutaneous sarcoidosis                             | 3     | Guttated Lichen Planus                                | 1     |
| Acne Conglobata                     | 76    | Hypertrophic Lichen Planus           | 10    | Demodicosis                                       | 3     | Haemorrhoids                                          | 1     |
| Infected Eczema                     | 73    | Keratoderma                          | 10    | Drug Rash                                         | 3     | Hyper Hydrosis                                        | 1     |
| Topical Steroid Damaged Face        | 64    | Post-Inflammatory hypopigmentation   | 10    | Dry Discoid Eczema                                | 3     | Hyperpigmentation disorder                            | 1     |
| Seborrheic Dermatitis               | 60    | Pustular Scabies                     | 10    | Erythema Annulare Centrifugum                     | 3     | Infected Nodule                                       | 1     |
| Lichen Planus                       | 57    | Sweat Dermatitis                     | 10    | Facial hypermelanosis                             | 3     | Infection of toe web                                  | 1     |
| Photodermatitis                     | 55    | Diabetic Ulcer                       | 9     | Herpes Labialis                                   | 3     | Inflammatory Linear                                   | 1     |
| Post-Inflammatory hyperpigmentation | 54    | Disseminated Eczema                  | 9     | Keratolysis Exfoliativa                           | 3     | Verrucous Epidermal Nevus                             | 1     |
| Scrotal Dermatitis                  | 54    | Fissure Foot                         | 9     | Lichen striatus                                   | 3     | Inverse psoriasis                                     | 1     |
| Urticaria                           | 52    | Idiopathic Guttate Hypomelanosis     | 9     | Maduromycosis                                     | 3     | Keratoacanthoma                                       | 1     |
| Pruritic Urticarial Papules         | 48    | Keratosis pilaris                    | 9     | Mucosal Ulcer or Cyst                             | 3     | Keratoderma with Secondary Infection                  | 1     |
| Xerosis                             | 48    | Pityriasis rosea                     | 9     | Palmar psoriasis                                  | 3     | Kerion                                                | 1     |
| Pyoderma                            | 45    | Chromoblastomycosis                  | 8     | Paronychia                                        | 3     | Kyrle's Disease                                       | 1     |
| Onychomycosis                       | 44    | Chronic Bullous Disease of Childhood | 8     | Reticulate acropigmentation of Dohi               | 3     | Lichen simplex                                        | 1     |
| Candidal Balanoposthitis            | 42    | Pityriasis lichenoides chronica      | 8     | Rosacea                                           | 3     | Miliaria                                              | 1     |
| Palmoplantar Keratoderma            | 41    | Port wine stain                      | 8     | Seborrheic Melanosis                              | 3     | Mongolian spot                                        | 1     |
| Pemphigus vulgaris                  | 39    | Psoriasis Vulgaris                   | 8     | Skin ulcer                                        | 3     | Morphea                                               | 1     |
| Insect Bite Reaction                | 37    | Steroid Induced Facies               | 8     | Syphilis                                          | 3     | Mucus Cyst                                            | 1     |
| No Definite Diagnosis               | 37    | Acanthosis nigricans                 | 7     | Tinea Infected with secondary bacterial Infection | 3     | Myxoid Cyst                                           | 1     |
| Truncal Acne                        | 35    | Cherry Angioma                       | 7     | Varicose vein                                     | 3     | Nevus sebaceous                                       | 1     |
| Nodular Scabies                     | 34    | Dryness (xerosis)                    | 7     | Anetoderma                                        | 2     | Nodular vasculitis                                    | 1     |
| Prurigo nodularis                   | 34    | Epidermolysis Bullosa                | 7     | Angioedema                                        | 2     | Nutritional Dermatitis                                | 1     |
| Chronic plaque psoriasis            | 33    | Folliculitis Decalvans               | 7     | Congenital Disease                                | 2     | Ochronosis                                            | 1     |
| Herpes Zoster                       | 33    | Myctoma                              | 7     | Contact Dermatitis with secondary infection       | 2     | Pemphigus foliaceus                                   | 1     |
| Polymorphous Light Eruption         | 33    | Paederus dermatitis                  | 7     | Contact purpura                                   | 2     | Perioral dermatitis                                   | 1     |
| Allergic Contact Dermatitis         | 32    | Pellagra dermatitis                  | 7     | Corn                                              | 2     | Pigmented purpuric eruption                           | 1     |
| Furuncle                            | 32    | Pruritic dermatitis                  | 7     | Crusted eczematous dermatitis                     | 2     | Pseudo lymphoma                                       | 1     |
| Scabies Infected                    | 32    | Scleroderma                          | 7     | Ecchymosis                                        | 2     | Pseudoepitheliomatous keratotic & micaceous balanitis | 1     |
| Tinea Capitis                       | 32    | Seborrheic Keratosis                 | 7     | Epidermodysplasia Verruciformis                   | 2     | Pseudofolliculitis barbae                             | 1     |
| Atopic Dermatitis                   | 30    | Striae                               | 7     | Erythema multiforme                               | 2     | Pseudolymphoma                                        | 1     |
| Lichen Simplex Chronicus            | 29    | Xerosis vulgaris                     | 7     | Foot ulcer                                        | 2     | Purpuric Dermatoses                                   | 1     |
| Pityriasis Alba                     | 27    | Cutaneous amyloidosis                | 6     | Geographic Tongue                                 | 2     | Pustular psoriasis                                    | 1     |
| Wart                                | 27    | Diaper Dermatitis                    | 6     | Granuloma annulare                                | 2     | SLE - Systemic lupus erythematosus-related syndrome   | 1     |
| Androgenic Alopecia                 | 26    | Infected Keratoderma                 | 6     | Itchy skin eruption                               | 2     | Steatocystoma Multitplex                              | 1     |
| Candidal Vulvovaginitis             | 24    | Lichen sclerosus                     | 6     | Lichen spinulosus                                 | 2     | Syringoma                                             | 1     |
| Impetigo                            | 24    | Viral exanthem                       | 6     | Linear Lichen Planus                              | 2     | Tick bite                                             | 1     |
| Folliculitis                        | 23    | Darier's disease                     | 5     | Melanoma                                          | 2     | Trophic Ulcer                                         | 1     |
| Guttate Psoriasis                   | 22    | Drug eruption                        | 5     | Nail dystrophy                                    | 2     | White piedra                                          | 1     |
| Tinea                               | 22    | Infected Tinea                       | 5     | Necrotizing Fasciitis                             | 2     | Xanthelasma Palpebrarum                               | 1     |
| Acrochordon                         | 21    | Keloid Milium                        | 5     | Neurofibroma                                      | 2     | Xanthoma                                              | 1     |
| Keloid                              | 21    | Lichen planopilaris                  | 5     | Nevus anemicus                                    | 2     |                                                       |       |
| Lichen Planus pigmentosus           | 21    | Lipoma                               | 5     | Nevus Depigmentosus                               | 2     |                                                       |       |
| Acne Scars                          | 20    | Oral Candidiasis                     | 5     | Ophiasis                                          | 2     |                                                       |       |
| Cheilitis                           | 20    | Phrynoderma                          | 5     | Pseudomonas                                       | 2     |                                                       |       |
| Dermatosis Papulosa Nigra           | 17    | Prurigo                              | 5     | Psuederma gangrenosum                             | 2     |                                                       |       |
| Nevocytic nevus                     | 17    | Squamous Cell Carcinoma              | 5     | Staphylococcal Scalded Skin Syndrome              | 2     |                                                       |       |
| Tinea Manuum                        | 17    | Trichoepithelioma                    | 5     | Zoon's Balanitis                                  | 2     |                                                       |       |
| Traction alopecia                   | 17    | Varicella Zoster                     | 5     |                                                   |       |                                                       |       |
| Actinic Dermatitis                  | 16    | Ecthyma                              | 4     |                                                   |       |                                                       |       |
| Tinea pedis                         | 16    |                                      |       |                                                   |       |                                                       |       |
| Chronic actinic dermatitis          | 15    |                                      |       |                                                   |       |                                                       |       |
| Textile Dermatitis                  | 15    |                                      |       |                                                   |       |                                                       |       |
| Burn of skin                        | 14    |                                      |       |                                                   |       |                                                       |       |
| Fixed Drug Eruption                 | 14    |                                      |       |                                                   |       |                                                       |       |
| Hidradenitis                        | 14    |                                      |       |                                                   |       |                                                       |       |
| Lichen nitidus                      | 14    |                                      |       |                                                   |       |                                                       |       |
| Molluscum Contagiosum               | 14    |                                      |       |                                                   |       |                                                       |       |
| Phytophotodermatitis                | 14    |                                      |       |                                                   |       |                                                       |       |
| Prurigo Simplex                     | 14    |                                      |       |                                                   |       |                                                       |       |

Table 6: Hierarchical label mapping: Main Class → Sub Class → Disease Label

| Main Class                | Subclass                                                                      | Disease Labels                                                                                                                                                                                                                                                                                                                                                                                                                                                                                                                                                                                                                                                                                                                                                                                                                                          |
|---------------------------|-------------------------------------------------------------------------------|---------------------------------------------------------------------------------------------------------------------------------------------------------------------------------------------------------------------------------------------------------------------------------------------------------------------------------------------------------------------------------------------------------------------------------------------------------------------------------------------------------------------------------------------------------------------------------------------------------------------------------------------------------------------------------------------------------------------------------------------------------------------------------------------------------------------------------------------------------|
| Infectious Disorders      | Infectious skin conditions -Bacterial                                         | Cellulitis, Cutaneous Anthrax, Diabetic Ulcer, Ecthyma, Erythrasma, Folliculitis, Folliculitis Decalvans, Foot ulcer, Furuncle, Impetigo, Infected Eczema, Lupus vulgaris, Necrotizing Fasciitis, Pseudofolliculitis barbae, Pseudomonas, Pyoderma, Pyoderma gangrenosum, Scabies Infected, Skin ulcer, Staphylococcal Scalded Skin Syndrome, Syphilis, Ulcer                                                                                                                                                                                                                                                                                                                                                                                                                                                                                           |
|                           | Infectious skin conditions -Fungal                                            | Candidal Balanoposthitis, Candidal Intertrigo, Candidal Vulvovaginitis, Infected Tinea, Infection of toe web, Kerion, Onychomycosis, Oral Candidiasis, Paronychia, Steroid Modified Tinea, Tinea, Tinea Capitis, Tinea Corporis, Tinea Cruris, Tinea Faciei, Tinea Infected with secondary bacterial Infection, Tinea Manuum, Tinea Versicolor, White piedra ,Tinea pedis                                                                                                                                                                                                                                                                                                                                                                                                                                                                               |
|                           | Infectious skin conditions -Fungal + Infectious skin conditions -Bacterial    | Chromoblastomycosis, Infected Tinea, Maduromycosis, Mycetoma, Mycosis fungoides, Pyoderma, Tinea Cruris, Tinea Infected with secondary bacterial Infection                                                                                                                                                                                                                                                                                                                                                                                                                                                                                                                                                                                                                                                                                              |
|                           | Infectious skin conditions -Leprosy                                           | Hansen's disease                                                                                                                                                                                                                                                                                                                                                                                                                                                                                                                                                                                                                                                                                                                                                                                                                                        |
|                           | Infectious skin conditions -Parasitic                                         | Cutaneous larva migrans, Demodicosis, Molluscum Contagiosum, Nodular Scabies, Nodular vasculitis, Pustular Scabies, Scabies, Scabies Infected, Tick bite                                                                                                                                                                                                                                                                                                                                                                                                                                                                                                                                                                                                                                                                                                |
|                           | Infectious skin conditions -Parasitic + Infectious skin conditions -Bacterial | Molluscum Contagiosum, Pustular Scabies, Scabies Infected                                                                                                                                                                                                                                                                                                                                                                                                                                                                                                                                                                                                                                                                                                                                                                                               |
|                           | Infectious skin conditions -Viral                                             | Chickenpox exanthem, Corn, Epidermodysplasia Verruciformis, Herpes Labialis, Herpes Zoster, Herpes genitalis, Varicella Zoster, Verruca Vulgaris, Viral exanthem, Wart                                                                                                                                                                                                                                                                                                                                                                                                                                                                                                                                                                                                                                                                                  |
| Inflammatory Disorders    | Inflammatory skin diseases + Infectious skin conditions -Bacterial            | Chronic eczema with secondary infection, Contact Dermatitis with secondary infection, Cutaneous sarcoidosis, Hidradenitis, Infected Eczema, Infected Keratoderma, Infected Nodule, Keratoderma, Lichen Simplex Chronicus, Pseudomonas, Pustular psoriasis, Pyoderma gangrenosum                                                                                                                                                                                                                                                                                                                                                                                                                                                                                                                                                                         |
|                           | Inflammatory skin diseases + Infectious skin conditions -Fungal               | Lichen Simplex Chronicus, Palmoplantar Keratoderma, Steroid Modified Tinea, Tinea Corporis, Tinea Faciei                                                                                                                                                                                                                                                                                                                                                                                                                                                                                                                                                                                                                                                                                                                                                |
|                           | Inflammatory skin diseases (Eczema and Dermatitis)                            | Actinic Dermatitis, Allergic Contact Dermatitis, Atopic Dermatitis, Balanitis, Chronic actinic dermatitis, Contact Dermatitis, Crusted eczematous dermatitis, Diaper Dermatitis, Disseminated Eczema, Dry Discoid Eczema, Ear Eczema, Eczema, Eczematized Tinea, Kumkum Dermatitis, Nutritional Dermatitis, Paederus dermatitis, Pellagra dermatitis, Perioral dermatitis, Photodermatitis, Phytophotodermatitis, Pruritic dermatitis, Purpuric Dermatoses, Scrotal Dermatitis, Seborrheic Dermatitis, Sweat Dermatitis, Textile Dermatitis, Topical Steroid Damaged Face                                                                                                                                                                                                                                                                               |
|                           | Inflammatory skin diseases (Other)                                            | Angioedema, Bullous Fixed Drug Eruption, Bullous Pemphigoid, Chronic Bullous Disease of Childhood, Contact purpura, Discoid Lupus Erythematosus, Drug Rash, Drug eruption, Dryness (xerosis), Ecchymosis, Epidermolysis Bullosa, Epidermolysis Bullosa Simplex, Erythema Annulare Centrifugum, Erythema multiforme, Fissure Foot, Fixed Drug Eruption, Granuloma annulare, Insect Bite Reaction, Kyrle's Disease, Pemphigus foliaceus, Pemphigus vulgaris, Pigmented purpuric eruption, Polymorphous Light Eruption, Prurigo, Prurigo Simplex, Prurigo nodularis, Pruritic Urticarial Papules, Pseudo lymphoma, SLE - Systemic lupus erythematosus-related syndrome, Scleroderma, Seborrheic Melanosis, Steroid Induced Facies, Sun damaged skin, Urticaria, Urticarial vasculitis, Vasculitis, Xerosis vulgaris, Itchy skin eruption, Zoon's Balanitis |
|                           | Inflammatory skin diseases (Psoriasis and Lichenoid disorders)                | Chronic plaque psoriasis, Guttate Psoriasis, Guttate Lichen Planus, Hypertrophic Lichen Planus, Inverse psoriasis, Lichen Planus, Lichen Simplex Chronicus, Lichen nitidus, Lichen planopilaris, Lichen sclerosus, Lichen simplex, Lichen spinulosus, Lichen striatus, Lichenoid eruption, Linear Lichen Planus, Palmar psoriasis, Pityriasis Alba, Pityriasis lichenoides chronica, Pityriasis rosea, Psoriasis Vulgaris, Lichen Planus pigmentosus, Psoriasis                                                                                                                                                                                                                                                                                                                                                                                         |
| Keratanisation Disorders  | Keratanisation Disorders                                                      | Darier's disease, Keratoderma, Keratoderma with Secondary Infection, Keratolysis Exfoliativa, Keratosis pilaris, Palmoplantar Keratoderma, Pseudoepitheliomatous keratotic & micaceous balanitis, Seborrheic Keratosis                                                                                                                                                                                                                                                                                                                                                                                                                                                                                                                                                                                                                                  |
| Neoplasms And Tumors      | Neoplasms and tumors                                                          | Basal Cell Carcinoma, Bowen's Metastasis, Cutaneous amyloidosis, Dermatitis Papulosa Nigra, Keratoacanthoma, Lipoma, Melanoma, Neurofibroma, Squamous Cell Carcinoma, Trichoepithelioma                                                                                                                                                                                                                                                                                                                                                                                                                                                                                                                                                                                                                                                                 |
| Other Skin Disorders      | Other skin disorders                                                          | Anetoderma, Burn of skin, Cheilitis, Congenital Disease, Cyst, Dermatofibroma, Geographic Tongue, Granuloma pyogenic, Haemorrhoids, Hyper Hydrosis, Hypertrophic Scar / Keloid, Keloid, Keloid Milium, Lipoma, Milia, Morphea, Mucosal Ulcer or Cyst, Mucus Cyst, Nail dystrophy, Phimosis, Phrynoderma, Pseudolymphoma, Scar Condition, Striae, Sunburn, Trophic Ulcer, Varicose vein, Xanthelasma Palpebrarum, Xanthoma, Reticulate acropigmentation of Dohi, Xerosis                                                                                                                                                                                                                                                                                                                                                                                 |
| Pigmentary Disorders      | Pigmentary Disorders                                                          | Acanthosis nigricans, Becker nevus, Cherry Angioma, Epidermal nevus, Facial hypermelanosis, Hemangioma, Hyperpigmentation disorder, Idiopathic Guttate Hypomelanosis, Inflammatory Linear Verrucous Epidermal Nevus, Melasma, Mongolian spot, Nevocytic nevus, Nevus Depigmentosis, Nevus anemicus, Nevus sebaceous, Ochronosis, Port wine stain, Post-Inflammatory hyperpigmentation, Post-Inflammatory hypopigmentation, Vitiligo                                                                                                                                                                                                                                                                                                                                                                                                                     |
| Skin Appendages Disorders | Sebaceous Glands and Acneiform Disorders<br>Hair Disorders                    | Acne, Acne Conglobata, Acne Keloidalis, Acne Scars, Acrochordon, Miliaria, Myxoid Cyst, Rosacea, Steatocystoma Multiplex, Syringoma, Truncal Acne, Sebaceous Cyst Alopecia Areata, Androgenic Alopecia, Ophiasis, Traction alopecia                                                                                                                                                                                                                                                                                                                                                                                                                                                                                                                                                                                                                     |
| No Definite Diagnosis     | No Definite Diagnosis                                                         | No Definite Diagnosis                                                                                                                                                                                                                                                                                                                                                                                                                                                                                                                                                                                                                                                                                                                                                                                                                                   |
